# Supplementary material for: Techno-economic and life cycle assessment of an integrated electrocoagulation process for sustainable treatment of arsenic and fluoride contaminated groundwater
Source: Royal Society of Chemistry journal article supplement (doi:10.1039/d5ew00519a), 2025-11-12
Supplement: d5ew00519a1.pdf [file d5ew00519a1.pdf]

# **Techno-economic and Life cycle assessment of an integrated Electrocoagulation process for sustainable treatment of arsenic and fluoride contaminated groundwater**

Hemant Goyal, Prasenjit Mondal\*

Indian Institute of Technology Roorkee, Roorkee (Uttarakhand) India 247667

\*Corresponding author: Dr. Prasenjit Mondal, Professor, Department of Chemical  
Engineering, Indian Institute of Technology Roorkee, Roorkee (Uttarakhand) India PIN-  
247667

Email: [prasenjit.mondal@ch.iitr.ac.in](mailto:prasenjit.mondal@ch.iitr.ac.in)\*

## **Supplementary materials**

### **S1. Electrocoagulation water treatment**

In the electrocoagulation process, the coagulant was generated in situ by electro-dissolution of the aluminium electrode. Thus, it does not require any chemical addition. The polymeric compounds of aluminium hydroxide remove the arsenic and fluoride through coagulation, adsorption and charge neutralisation mechanisms. The effluent from the electrocoagulation reactor was sent to the sedimentation tank, from where 80 % of the total feed was collected as supernatant treated water, while 20% was in the form of slurry, which was collected from the bottom and filtered into the sludge dewatering unit (filter press). The sludge cake generated in the filter press was sun-dried and sent for its sustainable management.

The major management practices for sludge are immobilisation of sludge in bricks and composites, as well as utilisation as a catalyst support. The LCA of the laboratory-scale electrocoagulation process with sludge management as immobilisation in clay bricks has already been published in the authors' earlier work (Goyal & Mondal, 2022a). The present study focuses on the LCA with the impact of electrocoagulation reactor sizes and a detailed

techno-economic assessment of the complete process. Thus, the sludge management has been excluded from the present work.

The details of scale-up set-ups are obtained from the Indian patent IN 202311014986. The amount of aluminium dissolved in the EC reactor during the treatment process is evaluated using Faraday's law (equation S1). The energy consumed in the process is evaluated by equation S2. Sodium chloride (NaCl) was used to enhance the conductivity of the water. In the real field (R<sub>5</sub>), the contaminated water has more TDS and conductivity, thus less sodium chloride is required for the electrocoagulation process. The operating conditions and details of each setup are presented in Table \*\*.

$$C_{Al} = \frac{MIt}{zFV_R} \quad S1$$

$$E = \frac{I \times V \times t \times V_w \times 3.6}{V_R \times 60 \times 1000} MJ \quad S2$$

Here  $C_{Al}$  is the amount of aluminum dissolves per liter of solution,  $M$  is the atomic weight of electrode material (for aluminum  $M= 26.98$  g/mol),  $I$  is current supplied (in Ampere),  $t$  is the residence time (in seconds),  $z$  is charge (For  $Al = 3$ ),  $F$  is faraday's constant ( $F=96485$ ),  $V_R$  is the volume of reactor in liter,  $V_w$  is the volume of water to be treated,  $E$  is energy consumes in MJ and  $V$  is the voltage (in volts).

Table S1 Details of EC reactors, electrodes and operating conditions of the treatment process

| <b>Characteristics/<br/>conditions</b> | <b>R-1<br/>1.8 L</b>     | <b>R-2<br/>20 L</b>      | <b>R-3<br/>100 L</b>     | <b>R-4<br/>650 L</b> | <b>R-5<br/>1200 L</b>   |
|----------------------------------------|--------------------------|--------------------------|--------------------------|----------------------|-------------------------|
| Electrocoagulation reactor             |                          |                          |                          |                      |                         |
| Material                               | Perplex                  | Perplex                  | Perplex                  | Multilayer plastic   | Multilayer plastic      |
| Dimension(s)                           | 15×10×12 cm <sup>3</sup> | 40×20×25 cm <sup>3</sup> | 60×40×50 cm <sup>3</sup> | D=100 cm, H=71<br>cm | D= 120 cm, H=<br>110 cm |
| Working Volume                         | 1.4 L                    | 18 L                     | 80 L                     | 550 L                | 1000 L                  |
| Type                                   | Up-flow                  | Up-flow                  | Up-flow                  | Up-flow              | Up-flow                 |
| Electrodes                             |                          |                          |                          |                      |                         |
| No. of electrodes                      | 4                        | 12                       | 16                       | 28                   | 40                      |
| Shape                                  | Rectangular              | Rectangular              | Rectangular              | Rectangular          | Rectangular             |
| Dimensions                             | 8 cm ×8 cm               | 14 cm ×20 cm             | 30 cm ×30 cm             | 50 cm × 60 cm        | 50 cm × 60 cm           |
| Total Area                             | 0.0512 m <sup>2</sup>    | 0.672 m <sup>2</sup>     | 2.9 m <sup>2</sup>       | 16.8 m <sup>2</sup>  | 24 m <sup>2</sup>       |
| Plate arrangement                      | Parallel                 | Parallel                 | Parallel                 | Parallel             | Parallel                |
| Electrode gap                          | 1 cm                     | 1 cm                     | 1 cm                     | 1 cm                 | 1 cm                    |
| Operating conditions                   |                          |                          |                          |                      |                         |
| pH                                     | 7.0                      | 7.0                      | 7.0                      | 7.0                  | 6-7                     |

|                 |                         |                         |                         |                         |                      |
|-----------------|-------------------------|-------------------------|-------------------------|-------------------------|----------------------|
| Residence time  | 95 min                  | 95 min                  | 90 min                  | 85 min                  | 60 min               |
| Current density | $\sim 10 \text{ A/m}^2$ | $6.25 \text{ A/m}^2$ |
| Voltage         | 5-5.5 V                 | 2.5-3.5 V               | 2.2-2.4                 | 3-4 V                   | 6.5-7 V              |
| Stirring        |                         |                         |                         |                         |                      |
| Stirrer/pump    | 3 W stirrer             | 18 W (1 No.)            | 18 W (2 No.)            | 18 W (4 No.)            | 45 W (4 No.)         |

## Operational constraints of field-scale operation

In the field-scale electrocoagulation system, certain operational constraints were observed. The performance of the process is highly dependent on parameters such as pH, conductivity, electrode spacing, and current density, which require careful monitoring and control to ensure stable operation. Electrode passivation and wear over time may reduce treatment efficiency and necessitate periodic cleaning or replacement, thereby influencing long-term sustainability. Additionally, uninterrupted power supply and timely sludge withdrawal from the sedimentation unit are essential to avoid operational bottlenecks. These constraints highlight the importance of proper monitoring and maintenance protocols in real-field applications.

## S2 Life cycle inventory

Figure S1 shows the system boundary of the treatment process. The materials and energy input to the treatment process are presented in the life cycle inventory Table S2 for different plant capacity scenarios.

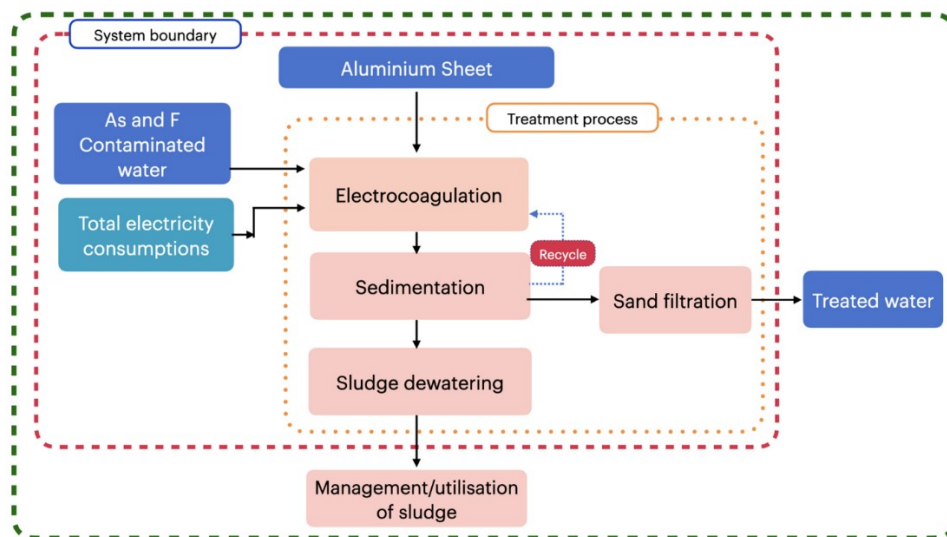

Figure S1 System boundary of the integrated treatment process for the LCA study

Table S2 Life cycle inventory for EC based different plant capacity treatment

|                                                      | <b>R<sub>1</sub></b> | <b>R<sub>2</sub></b> | <b>R<sub>3</sub></b> | <b>R<sub>4</sub></b> | <b>R<sub>5</sub></b> |
|------------------------------------------------------|----------------------|----------------------|----------------------|----------------------|----------------------|
| <b>Inputs</b>                                        |                      |                      |                      |                      |                      |
| As and F contaminated water                          | 1.01 m <sup>3</sup>  |
| Diesel mix at refinery (Al electrode transportation) | 0.00137 kg           | 0.00137 kg           | 0.00134 kg           | 0.0011 kg            | 0.000531 kg          |
| Al Electrode (Aluminium sheet)                       | 0.194 kg             | 0.194 kg             | 0.189 kg             | 0.155 kg             | 0.075 kg             |
| Electricity grid mix (electrochemical reaction)      | 11.04 MJ             | 6.3 MJ               | 4.4 MJ               | 6.1 MJ               | 3.8 MJ               |
| Electricity grid mix (stirring/mixing)               | 12.45 MJ             | 5.81 MJ              | 2.56 MJ              | 0.67 MJ              | 0.445 MJ             |
| Electricity grid mix (filtration)                    | -                    | -                    | -                    | -                    | 1.2 MJ               |
| Sodium chloride                                      | 0.5 kg               | 0.5 kg               | 0.5 kg               | 0.5 kg               | 0.15 kg              |
| <b>Outputs</b>                                       |                      |                      |                      |                      |                      |
| Treated water                                        | 1 m <sup>3</sup>     |
| Arsenic                                              | -0.54 g              | -0.54 g              | -0.54 g              | -0.54 g              | -0.64 g              |
| Fluoride                                             | -4.5 g               | -4.5 g               | -4.5 g               | -4.5 g               | -                    |

## Sample calculations

### (1) Aluminium electrode consumptions

**For R<sub>1</sub>**, Current density j: 10 A/m<sup>2</sup>; Residence time RT: 95 min = 95\*60 sec; Electrode area A: 0.0512 m<sup>2</sup>

Reactor volume V<sub>R</sub> = 1.4 L, Volume of water to be treated: V<sub>w</sub> = 1000 L

Aluminium dissolutions using Faraday's law

$$Al_{R_1} = \left( \frac{Mit}{zFV_R} \right) \times V_w = \left( \frac{M(j.A)t}{zFV_R} \right) \times V_w = \left( \frac{26.98 \times 10 \times 0.0512 \times 95 \times 60 \times 1000}{3 \times 96485 \times 1.4} \right) = 194 \frac{g}{L}$$

**For R<sub>2</sub>**, Current density j: 10 A/m<sup>2</sup>; Residence time RT: 95 min = 95\*60 sec; Electrode area A: 0.672 m<sup>2</sup>

Reactor volume V<sub>R</sub> = 18 L, Volume of water to be treated: V<sub>w</sub> = 1000 L

Aluminium dissolutions using Faraday's law

$$Al_{R_1} = \left( \frac{Mit}{zFV_R} \right) \times V_w = \left( \frac{M(j.A)t}{zFV_R} \right) \times V_w = \left( \frac{26.98 \times 9.9 \times 0.67 \times 95 \times 60 \times 1000}{3 \times 96485 \times 18} \right) = 194 \frac{g}{L}$$

**For R<sub>3</sub>**, Current density j: ~10 A/m<sup>2</sup>; Residence time RT: 90 min = 90\*60 sec; Electrode area A: 2.8 m<sup>2</sup>

Reactor volume V<sub>R</sub> = 80 L, Volume of water to be treated: V<sub>w</sub> = 1000 L

Aluminium dissolutions using Faraday's law

$$Al_{R_1} = \left( \frac{MIt}{zFV_R} \right) \times V_w = \left( \frac{M(j.A)t}{zFV_R} \right) \times V_w = \left( \frac{26.98 \times 10.35 \times 2.9 \times 90 \times 60 \times 1000}{3 \times 96485 \times 80} \right) = 189 \frac{g}{L}$$

**For R<sub>4</sub>**, Current density j: ~10 A/m<sup>2</sup>; Residence time RT: 85 min = 85\*60 sec; Electrode area A: 16.8 m<sup>2</sup>

Reactor volume V<sub>R</sub> = 550 L, Volume of water to be treated: V<sub>w</sub> = 1000 L

Aluminium dissolutions using Faraday's law

$$Al_{R_1} = \left( \frac{MIt}{zFV_R} \right) \times V_w = \left( \frac{M(j.A)t}{zFV_R} \right) \times V_w = \left( \frac{26.98 \times 10.7 \times 16.8 \times 85 \times 60 \times 1000}{3 \times 96485 \times 550} \right) = 155 \frac{g}{L}$$

**For R<sub>4</sub>**, Current density j: 6.25 A/m<sup>2</sup>; Residence time RT: 60 min = 60\*60 sec; Electrode area A: 24 m<sup>2</sup>

Reactor volume V<sub>R</sub> = 1000 L, Volume of water to be treated: V<sub>w</sub> = 1000 L

Aluminium dissolutions using Faraday's law

$$Al_{R_1} = \left( \frac{MIt}{zFV_R} \right) \times V_w = \left( \frac{M(j.A)t}{zFV_R} \right) \times V_w = 1.5 \times \left( \frac{26.98 \times 6.25 \times 24 \times 60 \times 60 \times 1000}{3 \times 96485 \times 1000} \right) = 75 \frac{g}{L}$$



## (2) Electricity consumption in electrochemical treatment

For **R<sub>1</sub>**, Current: 0.512 A, V: 5.3 V

$$E = \frac{I \times V \times RT \times V_w \times 3.6}{V_R \times 60 \times 1000} MJ = \frac{0.512 \times 5.3 \times 95 \times 1000 \times 3.6}{1.4 \times 60 \times 1000} = 11.04 MJ$$

For **R<sub>2</sub>**, Current: 6.65 A, V: 3 V

$$E = \frac{6.65 \times 3 \times 95 \times 1000 \times 3.6}{18 \times 60 \times 1000} = 6.3 MJ$$

For **R<sub>3</sub>**, Current: 30 A, V: 2.2 V

$$E = \frac{30 \times 2.2 \times 90 \times 1000 \times 3.6}{80 \times 60 \times 1000} = 4.45 MJ$$

For **R<sub>4</sub>**, Current: 180 A, V: 3.6 V

$$E = \frac{180 \times 3.6 \times 85 \times 1000 \times 3.6}{550 \times 60 \times 1000} = 6.0 MJ$$

For **R<sub>5</sub>**, Current: 150 A, V: 6.5 V

$$E = \frac{150 \times 7.0 \times 60 \times 1000 \times 3.6}{1000 \times 60 \times 1000} = 3.8 \text{ MJ}$$

### **S3 Life cycle impact assessment methodology**

The ReCiPe 2016 midpoint (H) method has been used for the assessment of impacts under the 18 different categories. The 18 different impact categories with their abbreviation and units are as follows: Global warming potential (GWP, kg CO<sub>2</sub> eq.), Terrestrial acidification (TAP, kg SO<sub>2</sub> eq.), Particulate matter formation potential (PMFP, kg PM<sub>2.5</sub> eq.), Ozone depletion potential (ODP, kg CFC-11 eq.), Freshwater consumption potential (FCP, m<sup>3</sup>), Land use (LUP, Annual crop eq. y), Fossil depletion potential (FDP, kg oil eq.), Metal depletion potential (MDP, kg Cu eq.), Ionizing radiation (IRP, kBq Co-60 eq. to air), Freshwater eutrophication potential (FEP, kg P eq.), Marine eutrophication (MEP, kg N eq.), Terrestrial eutrophication (TEP, kg 1,4 DCB eq.), Photochemical oxidant formation potential, human health (POFPH, kg NO<sub>x</sub> eq.), Photochemical oxidant formation potential, ecosystem (POFPE, kg NO<sub>x</sub> eq.), Freshwater ecotoxicity potential (FETP, kg 1,4 DCB eq.), Human toxicity potential, cancer (HTPc, kg 1,4 DCB eq.), Marine ecotoxicity potential (METP, kg 1,4 DCB eq.), Human toxicity potential, non-cancer (HTP nc, kg 1,4 DCB eq.).

Further endpoint impacts were evaluated in 22 impact categories aggregating into total 3 damages namely damage to ecosystem, human health and resources. The endpoint impact categories which are accountable for damage to ecosystem are described as follows (all have unit of species/year): Climate Change - Freshwater Ecosystem (CC-FE), Climate Change - Terrestrial Ecosystem (CC-TE), Freshwater Eutrophication (FC-FW), Terrestrial Eutrophication (FC-TE), Freshwater Ecotoxicity (FET), Freshwater Eutrophication Uncertainty (FEU), Land Occupation (LO), Metal Depletion - Ecosystem (MET), Mineral Extraction Uncertainty (MEU), Terrestrial Acidification (TA), Photochemical Ozone Formation - Ecosystem (POF-E), and Terrestrial Ecotoxicity (TET).

Further, the endpoint impact categories which are aggregated as damage to human health are described as follows (all have unit of DALY i.e. Disability-Adjusted Life Year): Climate

Change - Human Health (CC-HH), Particulate Matter Formation (PMF), Freshwater Consumption - Human Health (FC-HH), Human Toxicity – cancer effects (HT c), Human Toxicity – non-carcinogenic effects (HT nc), Ionizing Radiation (IR), Photochemical Ozone Formation – Human Health Impact (POF-HHI), and Stratospheric Ozone Depletion (SOD).

The depletion in resources is divided into two categories namely depletion in metal and fossil in the unit of USD (\$).

#### **S4 Single parameter sensitivity and Montecarlo uncertainty analysis**

To evaluate the impact of the individual parametric variations (through  $\pm 20\%$  of the base value) of different considered parameters (such as, aluminium electrode consumption, total electricity consumption, transportation distance, and arsenic removals) on the values of environmental impacts; single parameter sensitivity analysis has been performed by assessing the parameters disparity through considering only single parameter variation at a time and keeping all others factors fixed at their pre-determined values.

In contrast to single parameter sensitivity analysis which considers variation of individual parameter only two or more factors might interact at a time. Therefore, assessing the simultaneous interaction and/or variation in the above-mentioned parameters ( $\pm 20\%$  range), Monte Carlo simulations were performed with 1000 iterations. Further, both normal distribution and uniform distribution were used to evaluate the robustness of uncertainty analysis.

#### **S5 Techno-economic analysis**

The specific terms used in the TEA such as net cash flows, net present value, internal rate of return, profitability index and payback period are defined as follows along with their mathematical expressions:

##### **S5.1 Net cash flow (NCF)**

Cash flow is the movement of cash into and out of the company over a certain period. It is calculated by taking difference of net cash inflow and net cash outflow, as shown in equation (S1).

$$NCF = \Sigma inflow - \Sigma outflow \quad S1$$

The inflow in the present study are sales from the water and spent materials whereas outflows are OPEX and taxes.

### **S5.2 Net present value (NPV)**

NPV is the tool to analyse the profitability of the project or investment. It is the value of all future cash flows (positive or negative) over entire life of an investment discounted to the present. It can be calculated using equation (S2).

$$NPV = \Sigma_{t=0}^T \left( \frac{CF_t}{(1+i)^t} \right) - C_o \quad S2$$

Here  $CF_t$  is the cash flow for the period of  $t$ ,  $C_o$  is the initial investment,  $T$  is the entire life of project and  $i$  is the discount rate.

### **S5.3 Internal rate of return (IRR)**

IRR is the metric used in the financial analysis to estimate the profitability of the project or potential investment. IRR is the discount rate which makes the net present value of all the cash flows equal to zero. Equation S3 can be used for evaluating the IRR.

$$NPV = \Sigma_{t=1}^T \left( \frac{CF_t}{(1+IRR)^t} \right) - C_o = 0 \quad S3$$

Here, IRR is the internal rate of return

#### **S5.4 Profitability index (PI)**

PI is a financial metric used to evaluate the attractiveness of an investment or project. It measures the ratio of the present value of future cash flows generated by the project to the initial investment required. Equation (S4) can be used to evaluate the PI.

$$PI = \frac{NPV + C_o}{C_o} = 1 + \left( \frac{NPV}{C_o} \right) \quad (S4)$$

#### **S5.5 Payback period (PB)**

Payback Period is the length of time required for an investment to generate cash flows sufficient to recover the initial cost of the investment. It measures how quickly the invested capital can be recouped but does not consider the time value of money or cash flows occurring after the payback period.

For even (uniform) cash flows,

$$\text{Payback period} = \frac{\text{Cost of investment}}{\text{Average annual cash flow}}$$

For uneven cash flows, calculate the cumulative cash inflows year by year until the initial investment is recovered.

Table S3 Economic parameters and assumptions in TEA

| Particulars                                 | Values                                                    | Particulars                      | Values                                   |
|---------------------------------------------|-----------------------------------------------------------|----------------------------------|------------------------------------------|
| <b><i>General parameters</i></b>            |                                                           | <b><i>Labour costs</i></b>       |                                          |
| Tax rate                                    | 12% (Web-1)                                               | Operator                         | INR 500 /operator / 8-hour shift (Web-2) |
| Interest rate                               | 10% (Arora et al., 2018a; Banerjee et al., 2022)          |                                  |                                          |
| Economic life                               | 20 years (Gadkari et al., 2023)                           | <b><i>Utilities costs</i></b>    |                                          |
| Operating hours                             | 2800 to 8400 hours /year                                  | Electricity                      | INR 8.25 /kWh (Web-3)                    |
| Plant capacity                              | 1000 L per hour                                           |                                  |                                          |
| Number of weeks                             | 52 /year                                                  |                                  |                                          |
| Length of start-up period                   | 2 weeks                                                   |                                  |                                          |
| Depreciation method                         | Straight line (Arora et al., 2018b; Gadkari et al., 2023) | <b><i>Raw material costs</i></b> |                                          |
| Salvage value                               | 25% of the initial capital cost                           | Aluminum                         | INR 330 /kg (Web-4)                      |
|                                             |                                                           | Sodium chloride                  | INR 5 /kg (Web-5)                        |
| Product escalation                          | 5% /year                                                  | <b><i>Product costs</i></b>      |                                          |
| Raw material escalation                     | 4% /year                                                  | Water                            | INR 250 /m <sup>3</sup>                  |
| Operating and maintenance labour escalation | 10% /year                                                 | Spent sludge                     | INR 150 /kg (Web-6)                      |
| Utilities escalation                        | 10% /year                                                 |                                  |                                          |

### **S5.6 Assumptions involved in the TEA analysis**

1. The operation of the EC treatment plant has been considered for an 8-hour shift, in accordance with government manpower regulations (Web <https://www.24hourslaw.com/law/legal-working-hours-in-india/> )
2. The effect of electrode passivation in terms of an increase in power requirement has been considered. Based on the literature, a 10% increase in power requirement has been considered because of the passivation of electrodes.
3. The maintenance shutdowns for 8-, 16-, and 24-hour operation plants are considered as 5, 10, and 15 days, respectively. Less maintenance time is required for the 8- and 16-hour plants, as minor maintenance activities can be performed without a complete shutdown.



**Table S4 Breakdown of capital expenditures (Figures are in INR)**

| <b>Component</b>     | <b>Base scenario</b> | <b>With solar<br/>(8 hr operation)</b> | <b>With solar<br/>(16 h operation)</b> | <b>With solar<br/>(24 h operation)</b> |
|----------------------|----------------------|----------------------------------------|----------------------------------------|----------------------------------------|
| Equipment cost       | 1066000              | 1066000                                | 1066000                                | 1066000                                |
| Installation         | 200000               | 200000                                 | 200000                                 | 200000                                 |
| Building cost        | 150000               | 150000                                 | 150000                                 | 150000                                 |
| Utilities set-up     | 20000                | 20000                                  | 20000                                  | 20000                                  |
| Contingency          | 100000               | 100000                                 | 100000                                 | 100000                                 |
| Other field expenses | 100000               | 100000                                 | 100000                                 | 100000                                 |
| Solar power system   | 0                    | 450000                                 | 750000                                 | 1050000                                |
| <b>Total</b>         | 1636000              | 2086000                                | 2386000                                | 2686000                                |

**Table S5 Equipment cost with approximated salvage value (Figures are in INR)**

| <b>Component</b>      | <b>Cost</b>    | <b>Salvage value</b> |
|-----------------------|----------------|----------------------|
| EC reactor            | 25000          | 1000                 |
| EC stand              | 37500          | 10000                |
| EC wiring             | 25000          | 5000                 |
| Power supply unit     | 500000         | 150000               |
| Recirculation pump    | 18750          | 2000                 |
| Dosing pump for NaCl  | 9750           | 1000                 |
| Settling tank         | 250000         | 159198               |
| Sand filter           | 37500          | 5000                 |
| Filter press          | 125000         | 30000                |
| Overall piping system | 37500          | 2000                 |
| <b>Total</b>          | <b>1636000</b> | <b>365198</b>        |

## S6 Results and discussion

Table S6 Absolute values of environmental impacts from the different reactor capacity scenarios

| Impact category | Unit                 | R <sub>1</sub> | R <sub>2</sub> | R <sub>3</sub> | R <sub>4</sub> | R <sub>5</sub><br>(Real field plant) |
|-----------------|----------------------|----------------|----------------|----------------|----------------|--------------------------------------|
| GWP             | kg CO2 eq.           | 4.52           | 3.62           | 2.81           | 2.48           | 1.55                                 |
| PMFP            | kg PM2.5 eq.         | 2.21E-03       | 1.92E-03       | 1.68E-03       | 1.42E-03       | 7.83E-04                             |
| FDP             | kg oil eq.           | 1.42           | 1.10           | 8.57           | 7.57           | 4.72E-01                             |
| FCP             | m3                   | 3.52E-02       | 2.97E-02       | 2.63E-02       | 2.35E-02       | 1.15E-02                             |
| FETP            | kg 1,4 DB eq.        | -3.08E-02      | -3.09E-02      | -3.09E-02      | -3.09E-02      | 8.80E-05                             |
| FEP             | kg P eq.             | 1.72E-05       | 8.60E-06       | 5.30E-06       | 5.13E-06       | 3.99E-06                             |
| HTc             | kg 1,4-DB eq.        | -1.63E-01      | -1.65E-01      | -1.66E-01      | -1.67E-01      | 2.92E-03                             |
| HTnc            | kg 1,4-DB eq.        | -4.38E+01      | -4.37E+01      | -4.37E+01      | -4.37E+01      | -5.57E-02                            |
| IRP             | kBq Co-60 eq. to air | 1.16E-01       | 8.47E-02       | 7.05E-02       | 6.10E-02       | 3.53E-02                             |
| LUP             | Annual crop eq.·y    | 3.28E-01       | 1.69E-01       | 1.04E-01       | 1.00E-01       | 7.86E-02                             |
| METP            | kg 1,4-DB eq.        | -4.21E-02      | -4.23E-02      | -4.24E-02      | -4.25E-02      | 3.53E-04                             |
| MEP             | kg N eq.             | 1.29E-04       | 6.91E-05       | 4.40E-05       | 4.21E-05       | 3.17E-05                             |
| MDP             | kg Cu eq.            | 1.60E-02       | 1.25E-02       | 1.07E-02       | 9.14E-03       | 5.15E-03                             |
| EPOFP           | kg NOx eq.           | 5.73E-03       | 4.78E-03       | 3.94E-03       | 3.41E-03       | 2.01E-03                             |
| HPOFP           | kg NOx eq.           | 5.70E-03       | 4.76E-03       | 3.91E-03       | 3.39E-03       | 2.00E-03                             |
| ODP             | kg CFC-11 eq.        | 1.81E-06       | 1.18E-06       | 7.99E-07       | 7.43E-07       | 5.36E-07                             |
| TAP             | kg SO2 eq.           | 6.99E-03       | 6.00E-03       | 5.23E-03       | 4.45E-03       | 2.45E-03                             |
| TEP             | kg 1,4-DB eq.        | 8.22E-01       | 6.46E-01       | 5.11E-01       | 4.48E-01       | 2.76E-01                             |

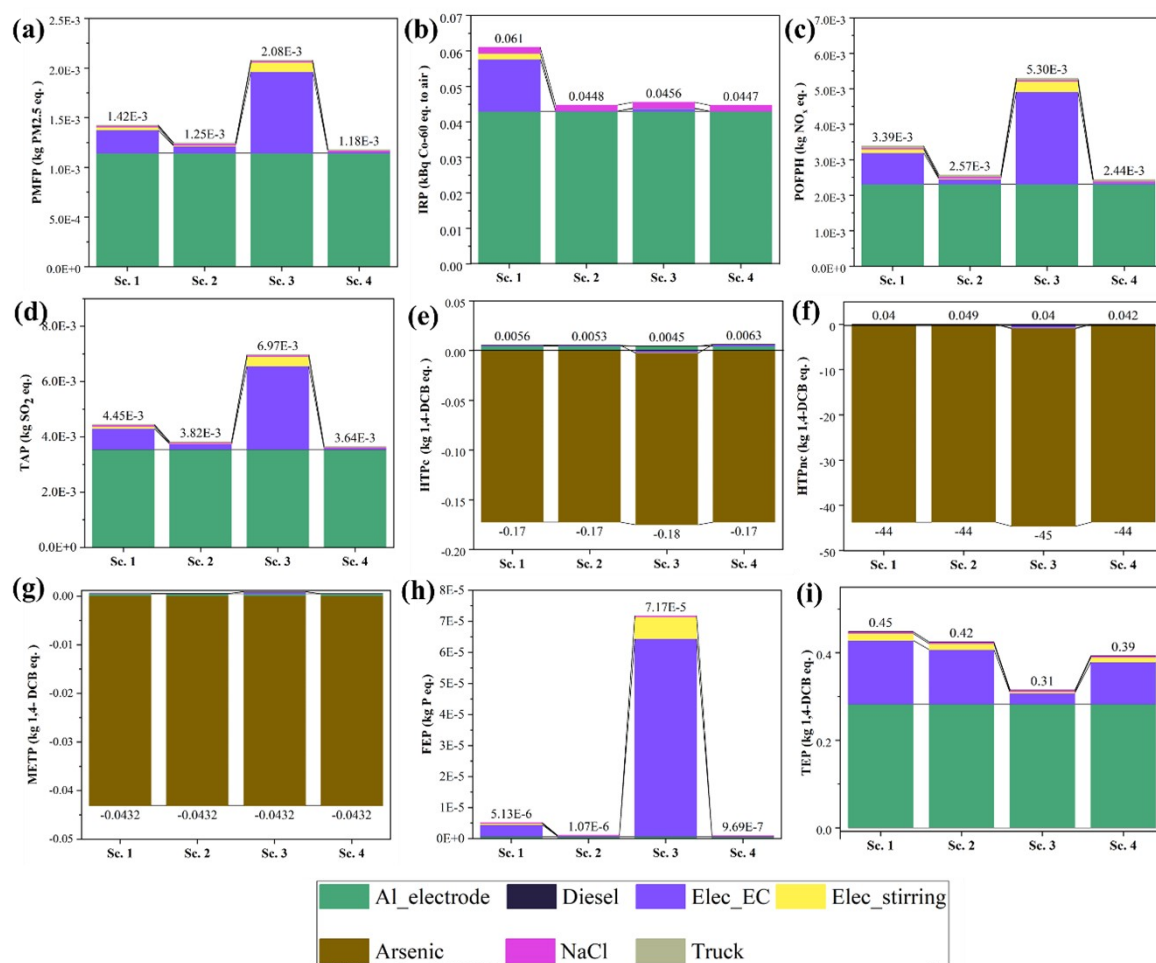

Figure S2 Environmental impacts from distinct electricity scenarios [Sc.1: Electricity from grid mix, Sc.2: Electricity from solar energy, Sc. 3: Electricity from biogas, Sc. 4: Electricity from wind energy] (a) PMFP, (b) IRP, (c) POFPH, (d) TAP, (e) HTP c, (f) HTP nc, (g) FDP, (h) POFPE and (i) MDP

Table S7: Absolute values of environmental impacts from the different electrical energy scenarios

| <b>Impact category</b> | <b>Unit</b>          | <b>Sc.-1</b> | <b>Sc. -2</b> | <b>Sc.-3</b> | <b>Sc.-4</b> |
|------------------------|----------------------|--------------|---------------|--------------|--------------|
| GWP                    | kg CO2 eq.           | 2.48         | 1.57          | 1.96         | 1.53         |
| PMFP                   | kg PM2.5 eq.         | 1.42E-03     | 1.25E-03      | 2.08E-03     | 1.18E-03     |
| FDP                    | kg oil eq.           | 7.57         | 4.82E-01      | 5.06E-01     | 4.70E-01     |
| FCP                    | m3                   | 2.35E-02     | 2.02E-02      | 3.00E-02     | 1.98E-02     |
| FETP                   | kg 1,4 DB eq.        | -3.09E-02    | -3.10E-02     | -3.07E-02    | -3.10E-02    |
| FEP                    | kg P eq.             | 5.13E-06     | 1.07E-06      | 7.17E-05     | 9.69E-07     |
| HTc                    | kg 1,4-DB eq.        | -1.67E-01    | -1.67E-01     | -1.71E-01    | -1.66E-01    |
| HTnc                   | kg 1,4-DB eq.        | -4.37E+01    | -4.37E+01     | -4.46E+01    | -4.37E+01    |
| IRP                    | kBq Co-60 eq. to air | 6.10E-02     | 4.48E-02      | 4.56E-02     | 4.47E-02     |
| LUP                    | Annual crop eq.·y    | 1.00E-01     | 2.06E-02      | 1.22         | 1.94E-02     |
| METP                   | kg 1,4-DB eq.        | -4.25E-02    | -4.26E-02     | -4.22E-02    | -4.26E-02    |
| MEP                    | kg N eq.             | 4.21E-05     | 1.15E-05      | 4.64E-04     | 1.05E-05     |
| MDP                    | kg Cu eq.            | 9.14E-03     | 7.67E-03      | 3.23E-02     | 7.81E-03     |
| EPOFP                  | kg NOx eq.           | 3.41E-03     | 2.59E-03      | 5.34E-03     | 2.46E-03     |
| HPOFP                  | kg NOx eq.           | 3.39E-03     | 2.57E-03      | 5.30E-03     | 2.44E-03     |
| ODP                    | kg CFC-11 eq.        | 7.43E-07     | 2.75E-07      | 3.96E-06     | 2.65E-07     |
| TAP                    | kg SO2 eq.           | 4.45E-03     | 3.82E-03      | 6.97E-03     | 3.64E-03     |
| TEP                    | kg 1,4-DB eq.        | 4.48E-01     | 4.25E-01      | 3.15E-01     | 3.93E-01     |

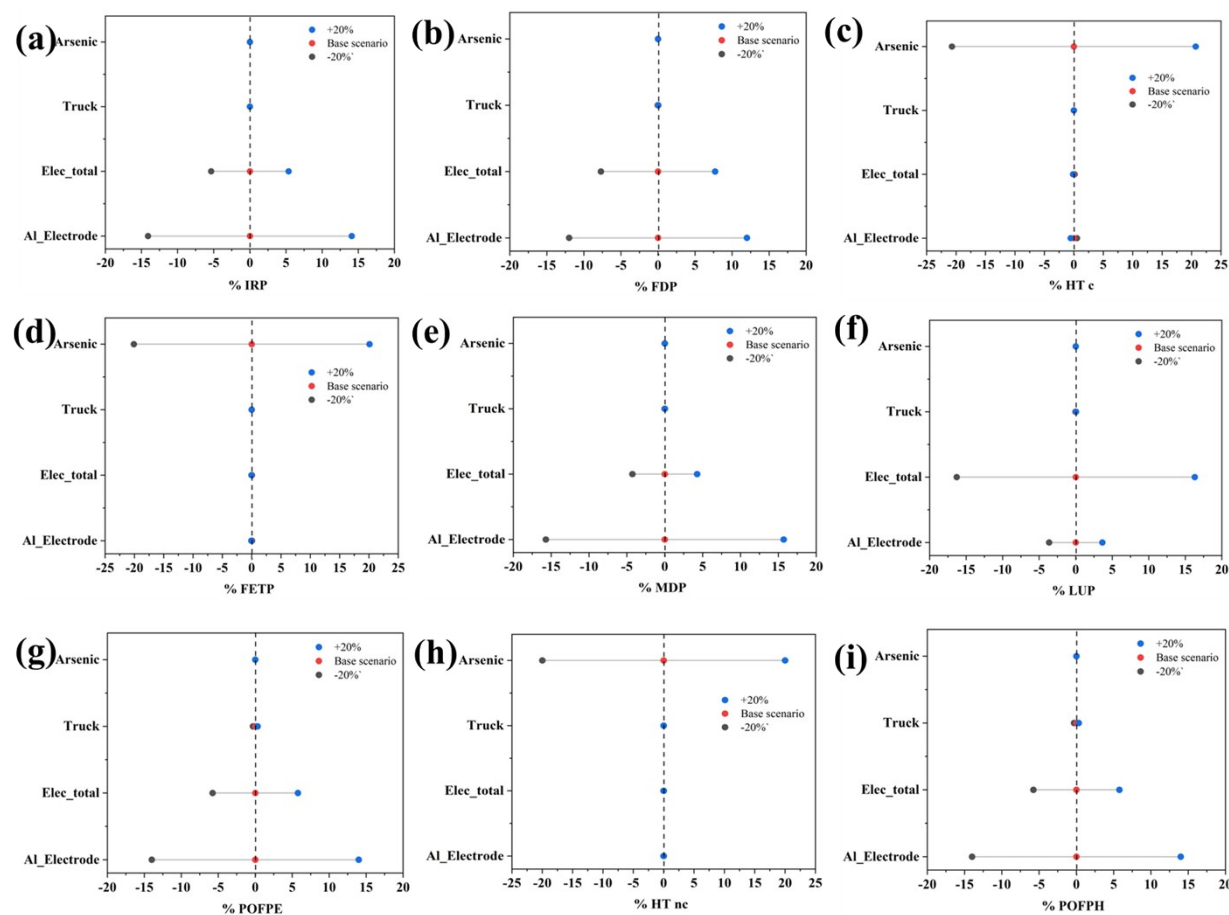

Figure S3 Impact of parametric sensitivity on the overall environmental impacts (a) IRP, (b) FDP, (c) HTc, (d) FETP, (e) MDP, (f) LUP, (g) POFPE, (h) HT nc and (i) POFPH

Table S8 Monte Carlo uncertainty analysis results considering the normal distribution for the 550 L (R<sub>4</sub>) reactor process

| Impact category | Unit                 | Basis scenario | Mean value | Standard deviation | 10%      | 25%      | Median   | 75%      | 90%      |
|-----------------|----------------------|----------------|------------|--------------------|----------|----------|----------|----------|----------|
| GWP             | kg CO2 eq.           | 2.76           | 2.78       | 13.60%             | 2.31     | 2.53     | 2.78     | 3.02     | 3.26     |
| PMFP            | kg PM2.5 eq.         | 0.00142        | 0.00144    | 16.10%             | 0.00115  | 0.00129  | 0.00143  | 0.00159  | 0.00173  |
| FDP             | kg oil eq.           | 0.757          | 0.761      | 13.80%             | 0.63     | 0.692    | 0.762    | 0.83     | 0.897    |
| FCP             | m3                   | -15.5          | -15.7      | -17.40%            | -19.1    | -17.5    | -15.6    | -13.9    | -12.2    |
| FETP            | kg 1,4 DB eq.        | -0.0309        | -0.0309    | -20%               | -0.0389  | -0.035   | -0.0311  | -0.0266  | -0.0227  |
| FEP             | kg P eq.             | 5.13E-06       | 5.12E-06   | 16.60%             | 4.07E-06 | 4.53E-06 | 5.12E-06 | 5.68E-06 | 6.18E-06 |
| HT c            | kg 1,4-DB eq.        | -0.167         | -0.167     | -20.60%            | -0.21    | -0.189   | -0.168   | -0.143   | -0.121   |
| HT nc           | kg 1,4-DB eq.        | -43.7          | -43.7      | -19.90%            | -55      | -49.5    | -43.9    | -37.6    | -32.1    |
| IRP             | kBq Co-60 eq. to air | 0.061          | 0.0615     | 14.60%             | 0.0501   | 0.0555   | 0.0613   | 0.0674   | 0.0731   |
| LUP             | Annual crop eq.·y    | 0.1            | 0.1        | 16.60%             | 0.0793   | 0.089    | 0.1      | 0.111    | 0.121    |
| METP            | kg 1,4-DB eq.        | -0.0425        | -0.0425    | -20.20%            | -0.0536  | -0.0482  | -0.0427  | -0.0365  | -0.031   |
| MEP             | kg N eq.             | 4.21E-05       | 4.21E-05   | 15.50%             | 3.39E-05 | 3.77E-05 | 4.21E-05 | 4.64E-05 | 5.04E-05 |
| MDP             | kg Cu eq.            | 0.00914        | 0.00923    | 15.80%             | 0.0074   | 0.0083   | 0.00917  | 0.0102   | 0.0111   |
| EPOFP           | kg NOx eq.           | 0.00341        | 0.00344    | 14.60%             | 0.00279  | 0.0031   | 0.00342  | 0.00377  | 0.00408  |
| HPOFP           | kg NOx eq.           | 0.00339        | 0.00341    | 14.60%             | 0.00278  | 0.00308  | 0.0034   | 0.00374  | 0.00405  |
| ODP             | kg CFC-11 eq.        | 7.43E-07       | 7.44E-07   | 14.40%             | 6.09E-07 | 6.76E-07 | 7.43E-07 | 8.17E-07 | 8.79E-07 |
| TAP             | kg SO2 eq.           | 0.00445        | 0.00449    | 16%                | 0.0036   | 0.00402  | 0.00446  | 0.00496  | 0.0054   |
| TEP             | kg 1,4-DB eq.        | 0.448          | 0.451      | 14.10%             | 0.371    | 0.41     | 0.451    | 0.493    | 0.533    |

Table S9 Monte Carlo uncertainty analysis results considering the uniform distribution for the 550 L (R<sub>4</sub>) reactor process

| <b>Impact category</b> | <b>Unit</b>          | <b>Basis scenario</b> | <b>Mean value</b> | <b>Standard deviation</b> | <b>10%</b> | <b>25%</b> | <b>Median</b> | <b>75%</b> | <b>90%</b> |
|------------------------|----------------------|-----------------------|-------------------|---------------------------|------------|------------|---------------|------------|------------|
| GWP                    | kg CO2 eq.           | 2.76                  | 2.76              | 7.99%                     | 2.47       | 2.6        | 2.76          | 2.93       | 3.05       |
| PMFP                   | kg PM2.5 eq.         | 0.00142               | 0.00142           | 9.40%                     | 0.00124    | 0.00132    | 0.00141       | 0.00153    | 0.0016     |
| FDP                    | kg oil eq.           | 0.757                 | 0.756             | 8.09%                     | 0.674      | 0.711      | 0.754         | 0.802      | 0.837      |
| FCP                    | m3                   | -15.5                 | -15.4             | -10.1%                    | -17.7      | -16.7      | -15.4         | -14.2      | -13.3      |
| FETP                   | kg 1,4 DB eq.        | -0.0309               | -0.031            | -11.4%                    | -0.0359    | -0.0338    | -0.031        | -0.0279    | -0.0261    |
| FEP                    | kg P eq.             | 5.13E-06              | 5.15E-06          | 9.40%                     | 4.48E-06   | 4.75E-06   | 5.15E-06      | 5.57E-06   | 5.80E-06   |
| HT c                   | kg 1,4-DB eq.        | -0.167                | -0.167            | -11.8%                    | -0.195     | -0.183     | -0.167        | -0.15      | -0.14      |
| HT nc                  | kg 1,4-DB eq.        | -43.7                 | -43.7             | -11.4%                    | -50.7      | -47.8      | -43.8         | -39.4      | -36.9      |
| IRP                    | kBq Co-60 eq. to air | 0.061                 | 0.0609            | 8.57%                     | 0.0539     | 0.0568     | 0.0605        | 0.0652     | 0.0679     |
| LUP                    | Annual crop eq.·y    | 0.1                   | 0.1               | 9.46%                     | 0.0875     | 0.0925     | 0.101         | 0.108      | 0.113      |
| METP                   | kg 1,4-DB eq.        | -0.0425               | -0.0425           | -11.6%                    | -0.0495    | -0.0465    | -0.0427       | -0.0383    | -0.0357    |
| MEP                    | kg N eq.             | 4.21E-05              | 4.22E-05          | 8.84%                     | 3.71E-05   | 3.91E-05   | 4.23E-05      | 4.54E-05   | 4.72E-05   |
| MDP                    | kg Cu eq.            | 0.00914               | 0.00911           | 9.26%                     | 0.00799    | 0.00847    | 0.00906       | 0.00982    | 0.0103     |
| EPOFP                  | kg NOx eq.           | 0.00341               | 0.0034            | 8.59%                     | 0.00301    | 0.00318    | 0.00339       | 0.00364    | 0.00379    |
| HPOFP                  | kg NOx eq.           | 0.00339               | 0.00338           | 8.58%                     | 0.00299    | 0.00316    | 0.00337       | 0.00361    | 0.00377    |
| ODP                    | kg CFC-11 eq.        | 7.43E-07              | 7.44E-07          | 8.30%                     | 6.61E-07   | 6.95E-07   | 7.44E-07      | 7.92E-07   | 8.27E-07   |
| TAP                    | kg SO2 eq.           | 0.00445               | 0.00443           | 9.35%                     | 0.00388    | 0.00411    | 0.00441       | 0.00478    | 0.005      |
| TEP                    | kg 1,4-DB eq.        | 0.448                 | 0.447             | 8.26%                     | 0.398      | 0.42       | 0.447         | 0.476      | 0.496      |



Table S10 Comparison between the results of normal and uniform distributions

| Impact category | Unit                 | Standard deviation |         |                | Median    |           |            |
|-----------------|----------------------|--------------------|---------|----------------|-----------|-----------|------------|
|                 |                      | Normal             | Uniform | Difference (%) | Normal    | Uniform   | Difference |
| GWP             | kg CO2 eq.           | 13.60%             | 7.99%   | 5.61%          | 2.78E+00  | 2.76E+00  | 0.72       |
| PMFP            | kg PM2.5 eq.         | 16.10%             | 9.40%   | 6.70%          | 1.43E-03  | 1.41E-03  | 1.40       |
| FDP             | kg oil eq.           | 13.80%             | 8.09%   | 5.71%          | 7.62E-01  | 7.54E-01  | 1.05       |
| FCP             | m3                   | -17.40%            | -10.10% | -7.30%         | -1.56E+01 | -1.54E+01 | 1.28       |
| FETP            | kg 1,4 DB eq.        | -20%               | -11.40% | -8.60%         | -3.11E-02 | -3.10E-02 | 0.32       |
| FEP             | kg P eq.             | 16.60%             | 9.40%   | 7.20%          | 5.12E-06  | 5.15E-06  | -0.59      |
| HT c            | kg 1,4-DB eq.        | -20.60%            | -11.80% | -8.80%         | -1.68E-01 | -1.67E-01 | 0.60       |
| HT nc           | kg 1,4-DB eq.        | -19.90%            | -11.40% | -8.50%         | -4.39E+01 | -4.38E+01 | 0.23       |
| IRP             | kBq Co-60 eq. to air | 14.60%             | 8.57%   | 6.03%          | 6.13E-02  | 6.05E-02  | 1.31       |
| LUP             | Annual crop eq.·y    | 16.60%             | 9.46%   | 7.14%          | 1.00E-01  | 1.01E-01  | -1.00      |
| METP            | kg 1,4-DB eq.        | -20.20%            | -11.60% | -8.60%         | -4.27E-02 | -4.27E-02 | 0.00       |
| MEP             | kg N eq.             | 15.50%             | 8.84%   | 6.66%          | 4.21E-05  | 4.23E-05  | -0.48      |
| MDP             | kg Cu eq.            | 15.80%             | 9.26%   | 6.54%          | 9.17E-03  | 9.06E-03  | 1.20       |
| EPOFP           | kg NOx eq.           | 14.60%             | 8.59%   | 6.01%          | 3.42E-03  | 3.39E-03  | 0.88       |
| HPOFP           | kg NOx eq.           | 14.60%             | 8.58%   | 6.02%          | 3.40E-03  | 3.37E-03  | 0.88       |
| ODP             | kg CFC-11 eq.        | 14.40%             | 8.30%   | 6.10%          | 7.43E-07  | 7.44E-07  | -0.13      |
| TAP             | kg SO2 eq.           | 16%                | 9.35%   | 6.65%          | 4.46E-03  | 4.41E-03  | 1.12       |
| TEP             | kg 1,4-DB eq.        | 14.10%             | 8.26%   | 5.84%          | 4.51E-01  | 4.47E-01  | 0.89       |

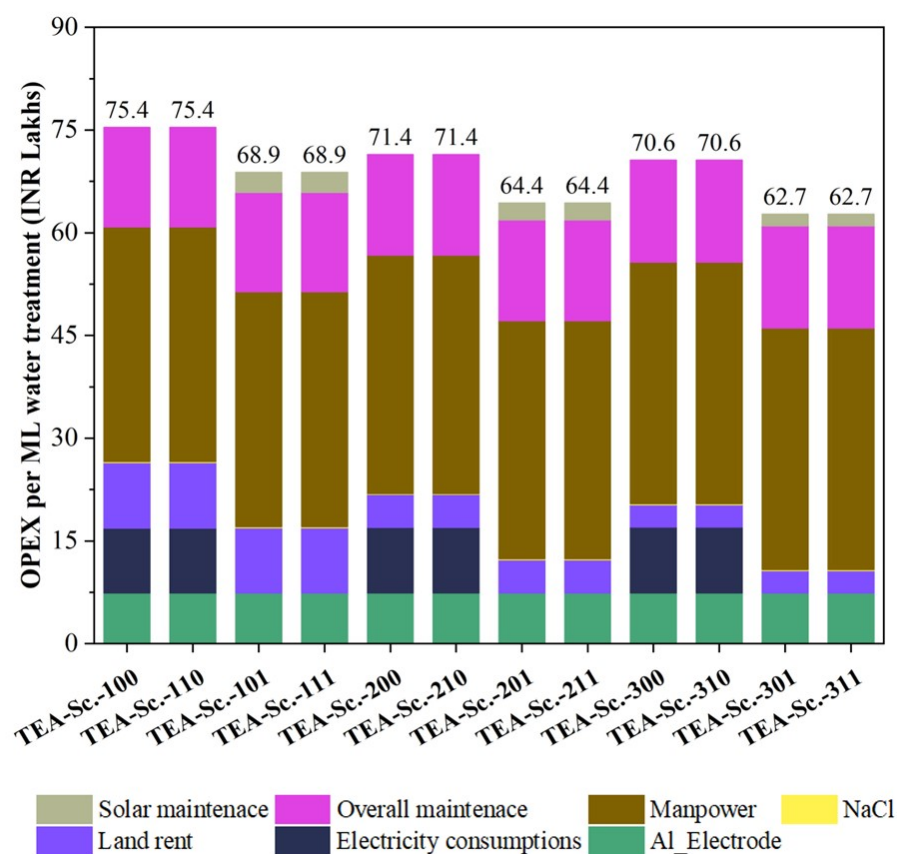

Figure S4 OPEX of the EC based water treatment system per Mega Liter (ML) of water treatment for different TEA scenarios

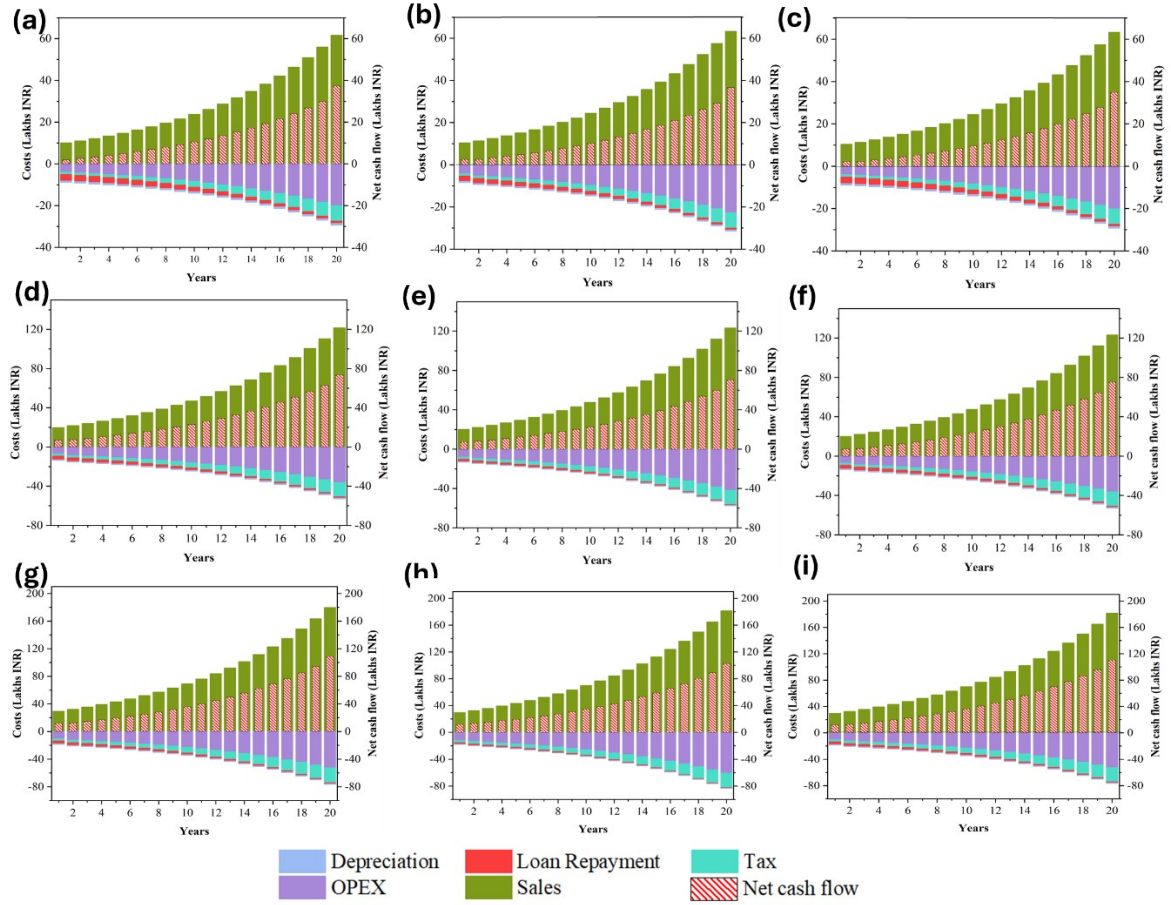

Figure S5 Cash flow and its breakdown into sales, operating cost, depreciation, tax and loan repayment (a) TEA\_Sc.\_101, (b) TEA\_Sc.\_110, (c) TEA\_Sc.\_111, (d) TEA\_Sc.\_201, (e) TEA\_Sc.\_210, (f) TEA\_Sc.\_211, (g) TEA\_Sc.\_301, (h) TEA\_Sc.\_310 and (i) TEA\_Sc.\_311

### **S6.1 Comparison with previous studies**

Comparison of the present work with earlier reports on adsorption, electrocoagulation, and reverse osmosis for water treatment is summarized in Table S7. Limited literature is available on integrated LCA and TEA studies for the simultaneous removal of arsenic and fluoride. Garfi et al., 2016 and Gani et al., 2023 reported LCA of RO systems for drinking water production that did not specifically target arsenic or fluoride. These studies showed relatively low GWP values of 1.6 and 0.05 kg CO<sub>2</sub> eq. per m<sup>3</sup>, respectively. The comparatively higher GWP in the present study can be attributed to the complexity of arsenic and fluoride removal, which requires more specialised processes compared to the treatment of general water quality parameters. However, the operating cost of RO (up to INR 200 per m<sup>3</sup>) was significantly higher than that of the present electrocoagulation system (INR 144 per m<sup>3</sup>), highlighting the techno-economic advantage of the developed approach.

Adsorption-based treatment methods were mostly reported for individual arsenic or fluoride removal, except for the study by Goyal & Mondal, 2022, which considered both contaminants together. LCA values reported by Rathore & Mondal, 2018 for fluoride removal and for arsenic removal were much higher than those obtained in the present work. Notably, Bisaria et al., 2024 reported a treatment cost of INR 13,142 per m<sup>3</sup> for arsenic removal, which is significantly higher compared to the present study (INR 144 per m<sup>3</sup>). Even though Anweshan et al. 2025 reported lower treatment cost for fluoride removal (INR 20.41 per m<sup>3</sup>), this can be explained by the fact that fluoride is relatively easier to remove than arsenic. Overall, adsorption processes demonstrate either high GWP or excessively high costs, limiting their sustainability in real-world applications.

The present study provides a novel integrated framework combining LCA and TEA for the simultaneous removal of arsenic and fluoride through electrocoagulation. Compared with adsorption- and RO-based alternatives, the developed process demonstrates a lower global

warming potential as well as reduced treatment cost, especially for simultaneous removal of arsenic and fluoride. These findings confirm the potential of electrocoagulation as a more sustainable and economically viable option for arsenic- and fluoride-contaminated groundwater treatment, filling an important gap in the existing literature.

Table S11 Comparison with other treatment methods and previous EC studies

| Contaminant                                           | Process                                              | LCA<br>Method                     | LCA results                                        | TEA          |                              | References               |
|-------------------------------------------------------|------------------------------------------------------|-----------------------------------|----------------------------------------------------|--------------|------------------------------|--------------------------|
|                                                       |                                                      |                                   |                                                    | CAPEX        | OPEX                         |                          |
| Drinking water treatment                              | Reverse osmosis                                      | CML<br>FU: 1 m <sup>3</sup>       | 1.6 kg CO <sub>2</sub> eq.<br>per m <sup>3</sup>   | Not reported | Not reported                 | (Garfi et al., 2016)     |
| Fluoride                                              | Laterite soil-based adsorbent                        | CML<br>FU: 720 L                  | 16.57 kg CO <sub>2</sub> eq.<br>per m <sup>3</sup> | Not reported | Not reported                 | (Rathore & Mondal, 2018) |
| Arsenic and fluoride                                  | AHNP-based adsorption                                | CML 2001<br>FU: 720 L             | 48.9 kg CO <sub>2</sub> eq.<br>per m <sup>3</sup>  | Not reported | INR 700 per m <sup>3</sup>   | (Goyal & Mondal, 2022c)  |
| Arsenic and fluoride                                  | Electrocoagulation                                   | CML 2001<br>FU: 720 L             | 6.25 kg CO <sub>2</sub> eq.<br>per m <sup>3</sup>  | Not reported | INR 100 per m <sup>3</sup>   | (Goyal & Mondal, 2022c)  |
| General water quality parameters<br>(Except As and F) | Tap water supply from drinking water treatment plant | CML<br>FU: 1 m <sup>3</sup> water | 0.03 kg CO <sub>2</sub> eq.<br>per m <sup>3</sup>  | Not reported | INR 22.31 per m <sup>3</sup> | (Gani et al., 2023)      |
| General water                                         | Domestic RO                                          | CML                               | 0.05 kg CO <sub>2</sub> eq.                        | Not          | INR 200 per                  | (Gani et al., 2023)      |

| quality parameters   |                                  |                         | per m <sup>3</sup>           | reported        | m <sup>3</sup>               |                         |
|----------------------|----------------------------------|-------------------------|------------------------------|-----------------|------------------------------|-------------------------|
| (Except As and F)    |                                  |                         | FU: 1 m <sup>3</sup> water   |                 |                              |                         |
| Arsenic              | Adsorption                       | ReCiPe method           | 33.54 kg CO <sub>2</sub> eq. | Not             | INR 13142                    | (Bisaria et al., 2024)  |
|                      | (Ni-Fe layered double hydroxide) | FU: 1 kg of adsorbent   | per m <sup>3</sup>           | reported        | per m <sup>3</sup>           |                         |
| Fluoride             | Electrocoagulation               | FU: 2500 L/h            | NA                           | INR 18.80 Lakhs | INR 20.41 per m <sup>3</sup> | (Anweshan et al., 2025) |
| Arsenic and Fluoride | Electrocoagulation               | ReCiPe                  | 2.37 kg CO <sub>2</sub> eq.  | INR 16.36       | INR 144 per m <sup>3</sup>   | This study              |
|                      |                                  | FU: 1000 m <sup>3</sup> | per m <sup>3</sup>           | Lakhs           | m <sup>3</sup>               |                         |

## References

- Anweshan, N., Mondal, P., & Purkait, M. K. (2025). Design and Techno-economics of an Electrocoagulation-Based Combined System for Fluoride Removal from Groundwater. *ACS ES and T Water*. <https://doi.org/10.1021/acsestwater.5c00146>
- Arora, A., Banerjee, J., Vijayaraghavan, R., MacFarlane, D., & Patti, A. F. (2018a). Process design and techno-economic analysis of an integrated mango processing waste biorefinery. *Industrial Crops and Products*, 116(January), 24–34. <https://doi.org/10.1016/j.indcrop.2018.02.061>
- Arora, A., Banerjee, J., Vijayaraghavan, R., MacFarlane, D., & Patti, A. F. (2018b). Process design and techno-economic analysis of an integrated mango processing waste biorefinery. *Industrial Crops and Products*, 116(February), 24–34. <https://doi.org/10.1016/j.indcrop.2018.02.061>
- Banerjee, S., Munagala, M., Shastri, Y., Vijayaraghavan, R., Patti, A. F., & Arora, A. (2022). Process Design and Techno-Economic Feasibility Analysis of an Integrated Pineapple Processing Waste Biorefinery. *ACS Engineering Au*, 2(3), 208–218. <https://doi.org/10.1021/acsengineeringau.1c00028>
- Bisaria, K., Seth, C. S., & Singh, R. (2024). Life cycle assessment of chitosan modified Ni-Fe layered double hydroxide for arsenic(iii) sequestration in aqueous medium: comparison of the impacts of adsorbent recycling, instrument use and source of energy. *Environmental Science: Advances*, 3(8), 1153–1162. <https://doi.org/10.1039/d3va00312d>
- Gadkari, S., Narisetty, V., Maity, S. K., Manyar, H., Mohanty, K., Jeyakumar, R. B., Pant, K. K., & Kumar, V. (2023). Techno-Economic Analysis of 2,3-Butanediol Production from Sugarcane Bagasse. *Industrial and Engineering Chemistry Research*, 11(22), 8337–8349. <https://doi.org/10.1021/acssuschemeng.3c01221>



Gani, K. M., Rather, S. R., Chandra, A., & Arshid, M. (2023). A case study of comparative techno-economic and life cycle assessment of tap water versus household reverse osmosis-based drinking water systems in a North Indian city. *Journal of Water Sanitation and Hygiene for Development*, 13(8), 595–603.  
<https://doi.org/10.2166/WASHDEV.2023.081>

Garfí, M., Cadena, E., Sanchez-Ramos, D., & Ferrer, I. (2016). Life cycle assessment of drinking water: Comparing conventional water treatment, reverse osmosis and mineral water in glass and plastic bottles. *Journal of Cleaner Production*, 137, 997–1003.  
<https://doi.org/10.1016/j.jclepro.2016.07.218>

Goyal, H., & Mondal, P. (2022a). Life cycle assessment (LCA) of the arsenic and fluoride removal from groundwater through adsorption and electrocoagulation: A comparative study. *Chemosphere*, 135243. <https://doi.org/10.1016/J.CHEMOSPHERE.2022.135243>

Goyal, H., & Mondal, P. (2022b). Life cycle assessment (LCA) of the arsenic and fluoride removal from groundwater through adsorption and electrocoagulation: A comparative study. *Chemosphere*, 304(May), 135243.  
<https://doi.org/10.1016/j.chemosphere.2022.135243>

Goyal, H., & Mondal, P. (2022c). Life cycle assessment (LCA) of the arsenic and fluoride removal from groundwater through adsorption and electrocoagulation: A comparative study. *Chemosphere*, 304(January), 135243.  
<https://doi.org/10.1016/j.chemosphere.2022.135243>

Rathore, V. K., & Mondal, P. (2018). Life cycle assessment of defluoridation of water using laterite soil based adsorbents. *Journal of Cleaner Production*, 180, 716–727.  
<https://doi.org/10.1016/j.jclepro.2018.01.176>

## **Weblinks**

Web-1 <https://www.paisabazaar.com/tax/gst-on-water/> (assessed on 1 Feb 2025)

Web-2 <https://www.sgcms.com/regulatory-updates/minimum-rate-of-wages-chhattisgarh-april-2025/> (assessed on 15 June 2025)

Web-3 <https://www.upcl.org/wp-content/uploads/2024/04/Public-Notice-Tariff-and-Charges-01-04-2024.pdf> (assessed on 15 December 2024)

Web-4 <https://economictimes.indiatimes.com/commoditysummary/symbol-ALUMINIUM.cms> (assessed on 25 March 2025)

Web-5 <https://dir.indiamart.com/impcat/sodium-chloride.html> (assessed on 15 December 2024)

Web-6 <https://www.indiamart.com/proddetail/gamma-alumina-catalyst-carriers-21305263988.html?srltid=AfmBOorQoKQOIhNaa6N1g5xerGob6LXIunWQc-kH2JJxcvfSL8Fky4KI> (assessed on 26 September 2025)
